# Supplementary material
Source: PubMed Central journal article supplement (PMC1182325)

# Supplemental Figure 1

## Summary of RNAi phenotypes

Untreated (WT)      Klp61F [BimC/Eg5] (Kinesin 5)      Klp10A [Kin I] (Kinesin 13)      Klp67A [Kip3] (Kinesin 8)      Ncd [Kin C] (Kinesin 14)      Pav [MKLP1] (Kinesin 6)

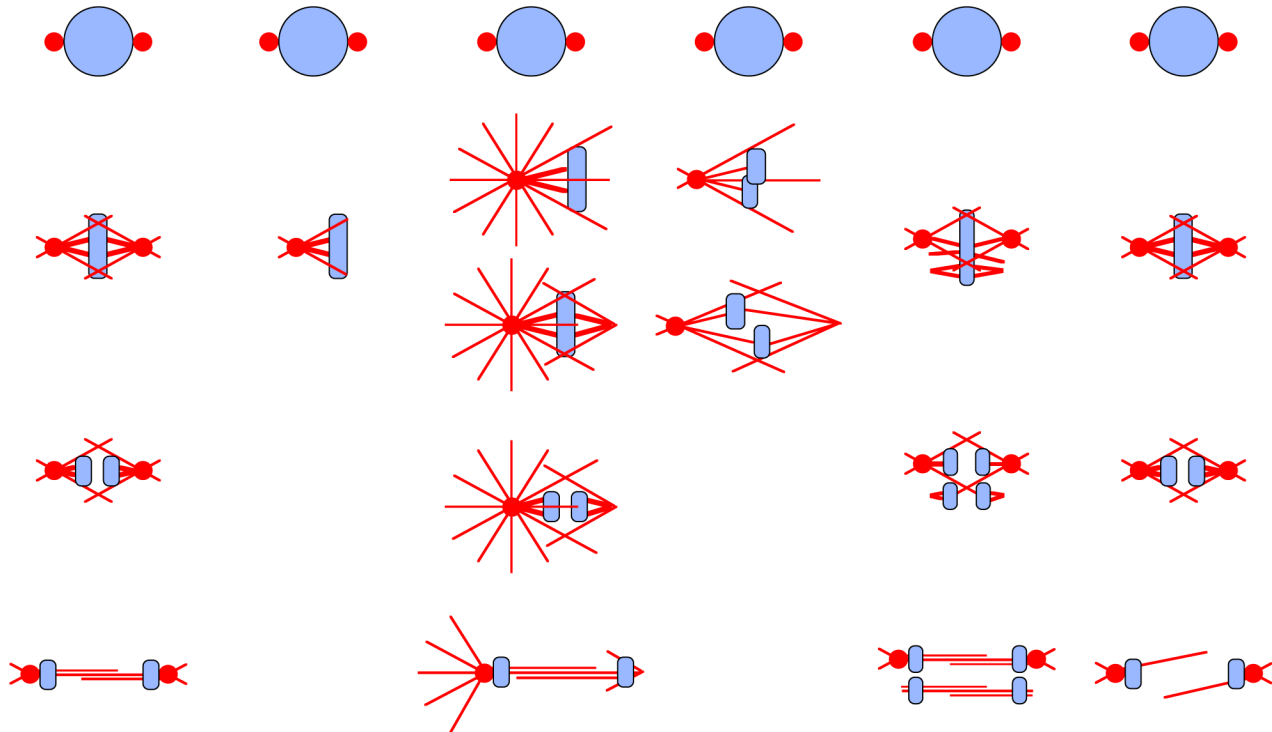

Supplement: mbc_E05-02-0118_1.pdf [file mbc_E05-02-0118_1.pdf]
