# Supplementary material
Source: PubMed Central journal article supplement (PMC1182325)

# Supplemental Figure 2

## A

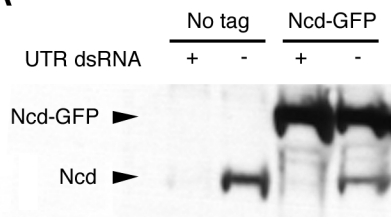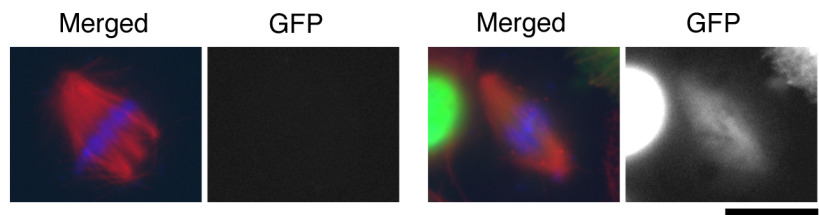

## B

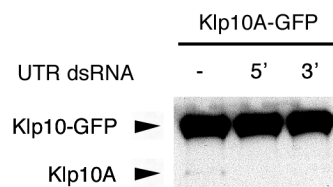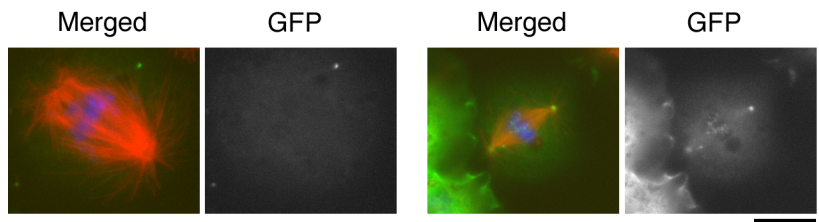

## C

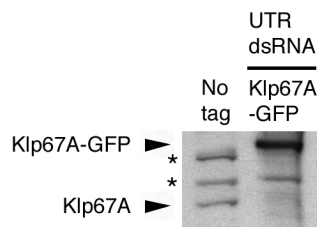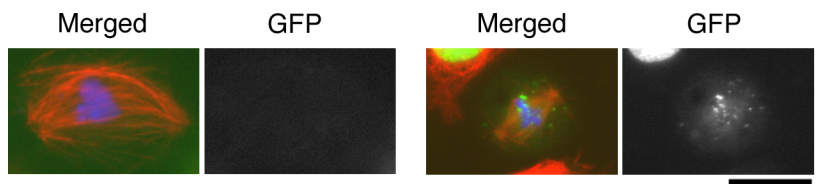

## D

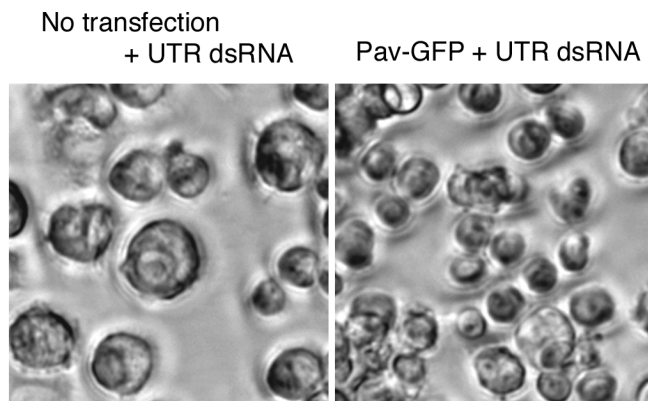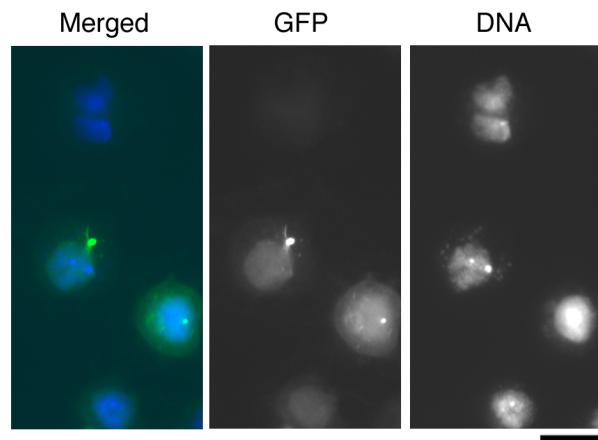

Supplement: mbc_E05-02-0118_2.pdf [file mbc_E05-02-0118_2.pdf]

# Supplemental Figure 3

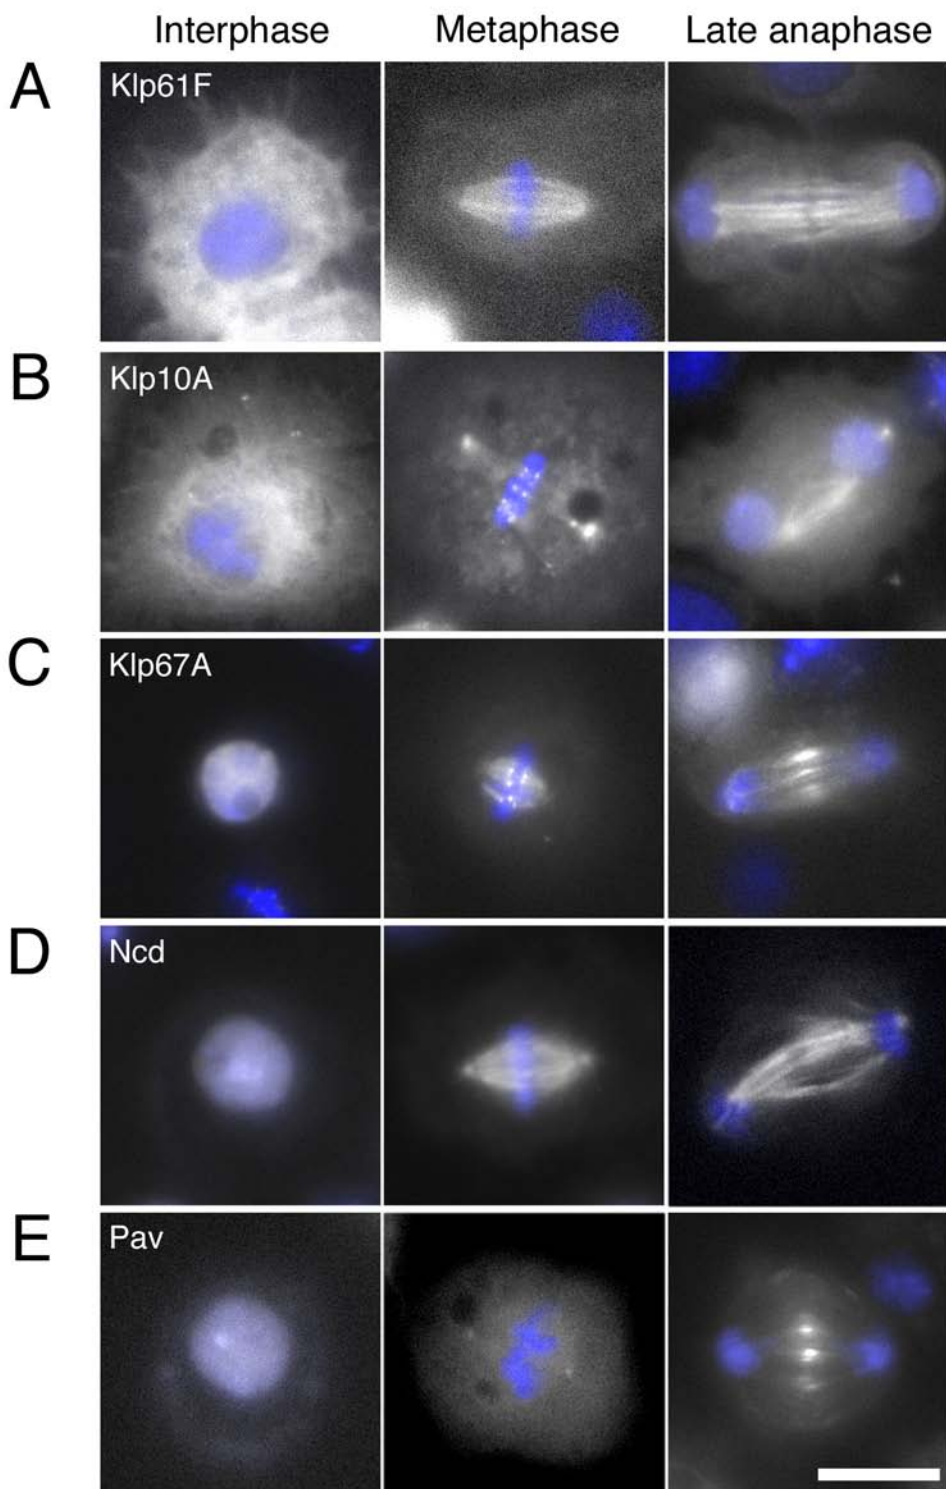

Supplement: mbc_E05-02-0118_3.pdf [file mbc_E05-02-0118_3.pdf]

# Supplemental Figure 4

## A Klp61F-GFP

No treatment

+Colchicine

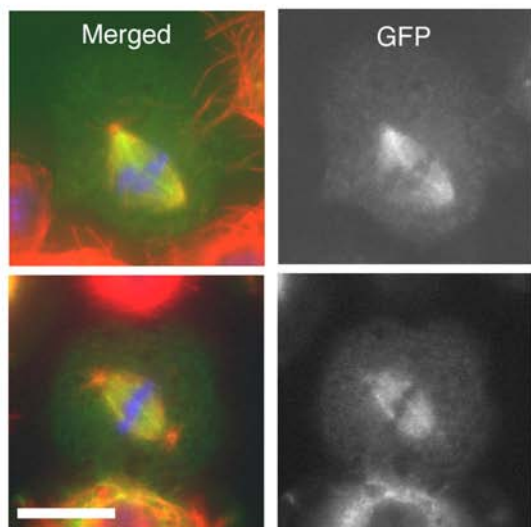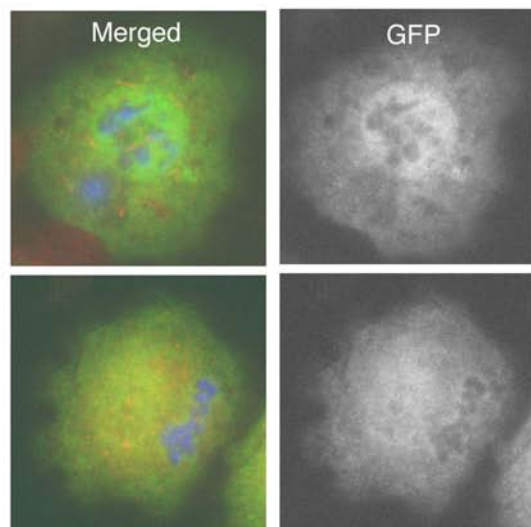

## B Ncd-GFP

No treatment

+Colchicine

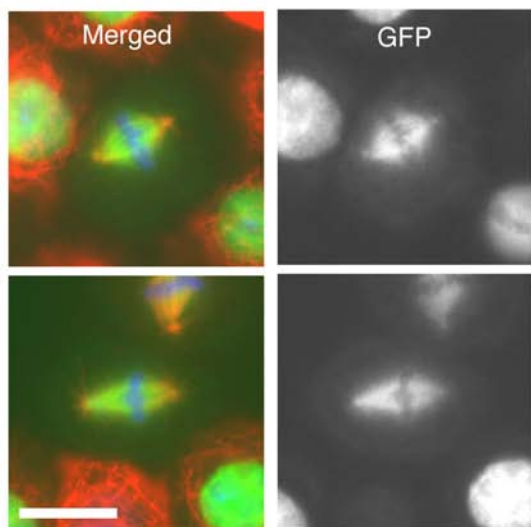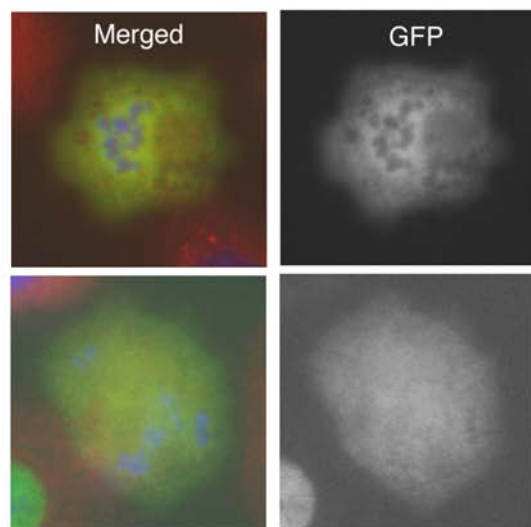

Supplement: mbc_E05-02-0118_4.pdf [file mbc_E05-02-0118_4.pdf]

# Supplemental Figure 5

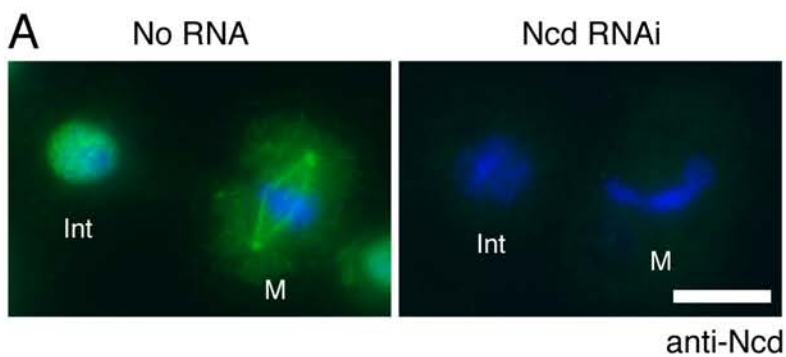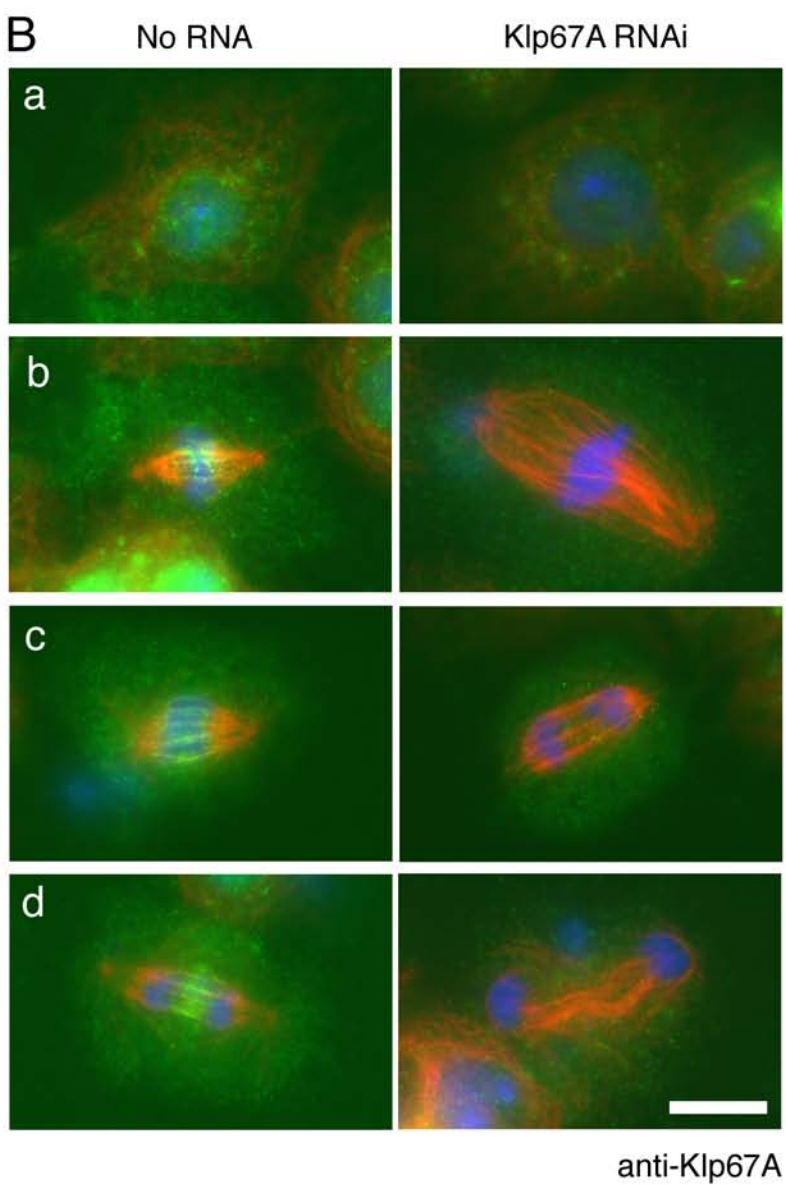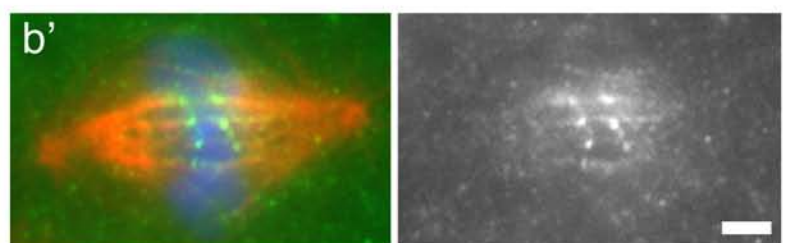

Supplement: mbc_E05-02-0118_5.pdf [file mbc_E05-02-0118_5.pdf]

# Supplemental Figure 6

## A Metaphase

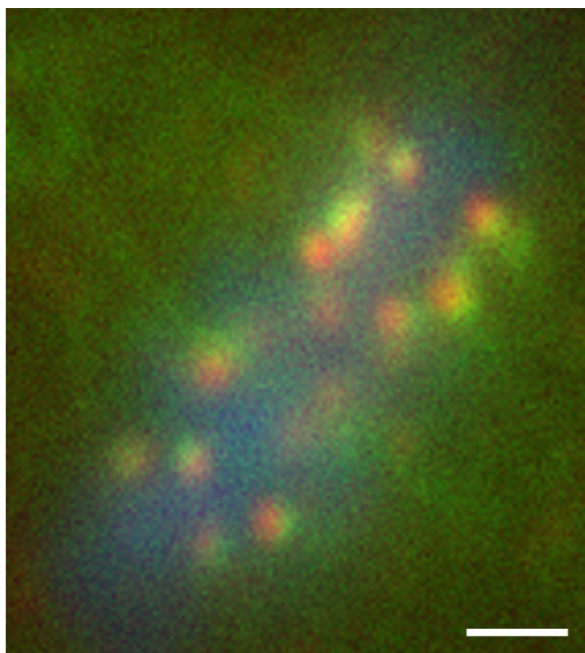

DNA/Klp67A/Cid(CENP-A)

## B Metaphase

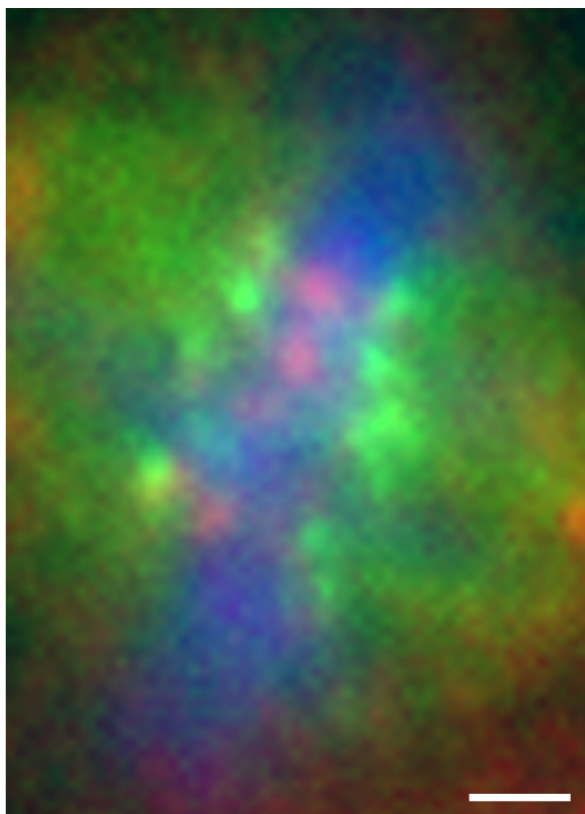

DNA/Klp67A/Klp10A

Supplement: mbc_E05-02-0118_6.pdf [file mbc_E05-02-0118_6.pdf]
